# Supplementary material for: Dissolved Trace Metals and Organic Matter Distribution in the Northern Adriatic, an Increasingly Oligotrophic Shallow Sea
Source: MDPI journal article supplement (doi:10.3390/w14030349), 2022-01-25
Supplement: s1 [file s1]

## Supplement information

### Dissolved trace metals and organic matter distribution in the northern Adriatic, an increasingly oligotrophic shallow sea

Abra Penezić<sup>a,\*</sup>, Blaženka Gašparović<sup>a,\*</sup>, Vlado Cuculić<sup>a</sup>, Slađana Strmečki<sup>a</sup>, Tamara Djakovac<sup>b</sup>, Marina Mlakar<sup>a</sup>

<sup>a</sup> *Division of Marine and Environmental Research, Ruđer Bošković Institute, POB 108, HR-10002 Zagreb, Croatia*

<sup>b</sup> *Center for Marine Research, Ruđer Bošković Institute, G. Paliaga 5, HR-52210 Rovinj, Croatia*

\*Corresponding authors: [abra@irb.hr](mailto:abra@irb.hr); [gaspar@irb.hr](mailto:gaspar@irb.hr)

Content: Figures S1-S6, Tables S1-S7

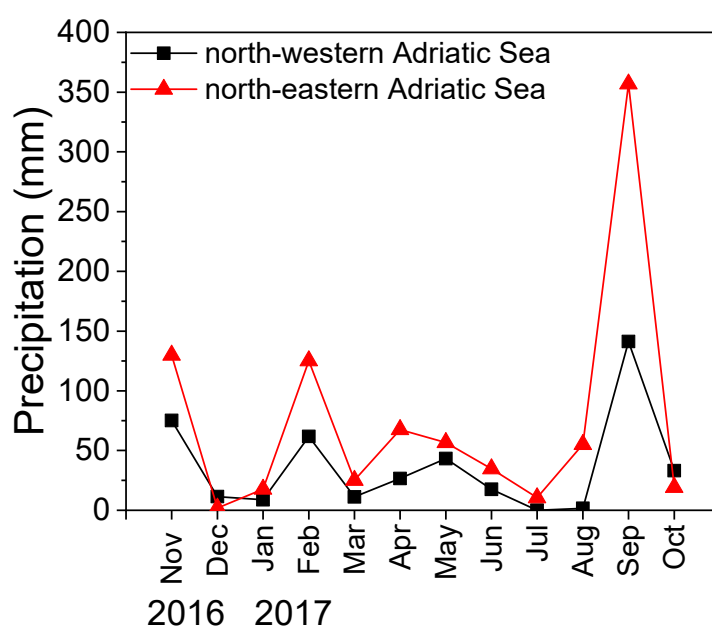

Figure S1. Monthly rain precipitation in the northern Adriatic.

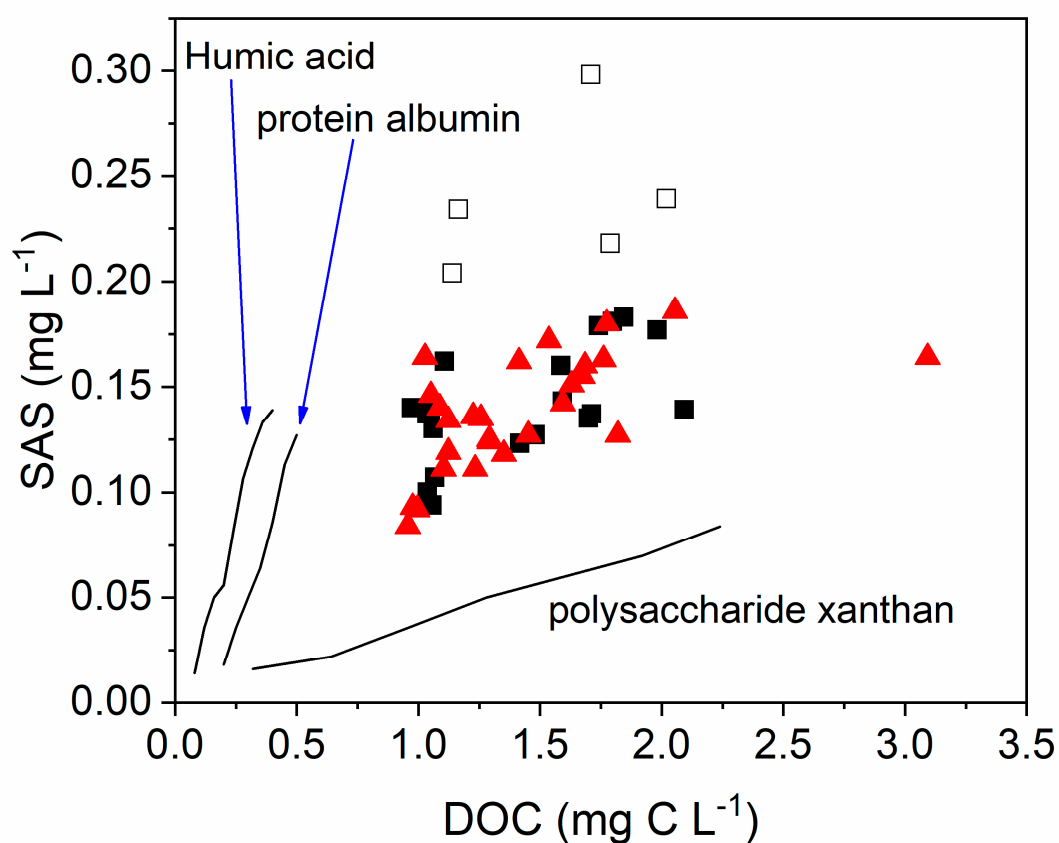

Figure S2. Surface-active organic substances (SAS) (eq. T-X-100, mg L<sup>-1</sup>) vs. DOC. Station 108 (■, □), station 107 (▲). Open squares represent high SAS vs. DOC detected at station 108. Lines represent SAS-DOC correlations for the selected model substances: humic acid, protein albumin and high molecular acidic polysaccharide xanthan.

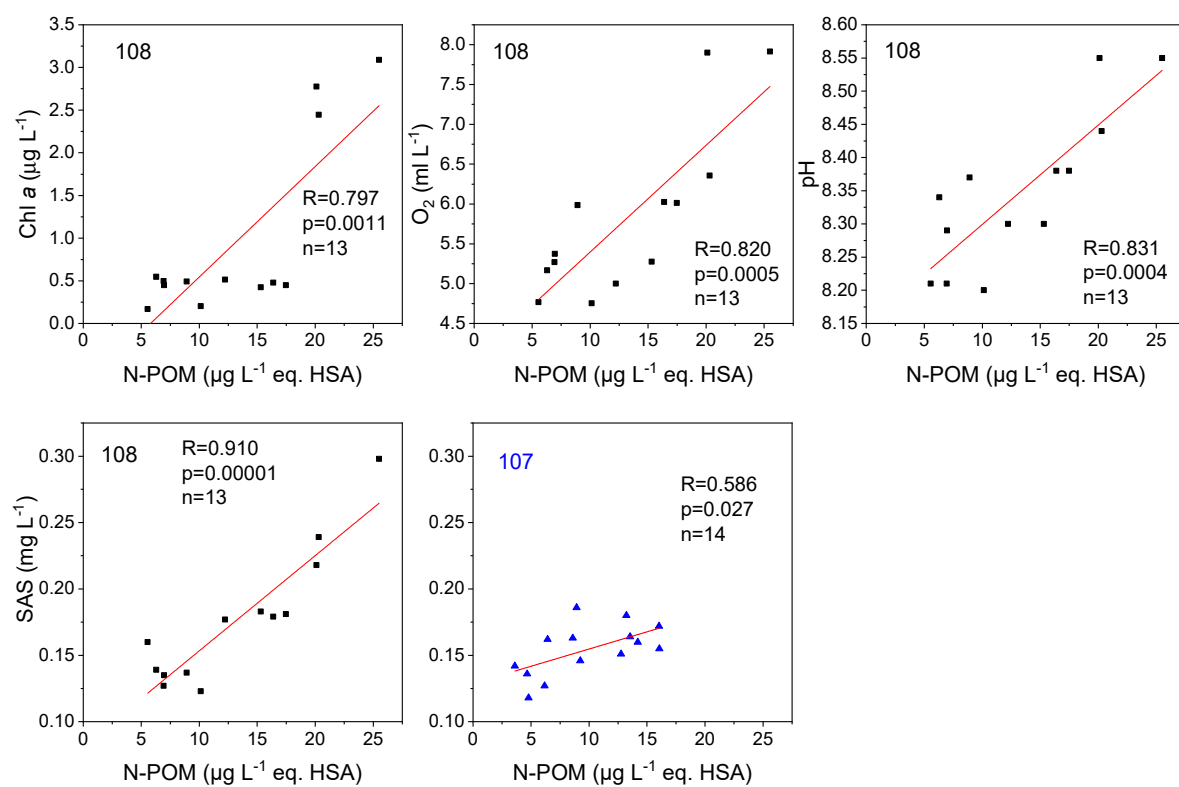

Figure S3. Nitrogen-containing polymeric organic material (N-POM) vs. Chl *a*,  $\text{O}_2$ , pH, and surface-active substances (SAS) for station 108 and N-POM vs. SAS for station 107.

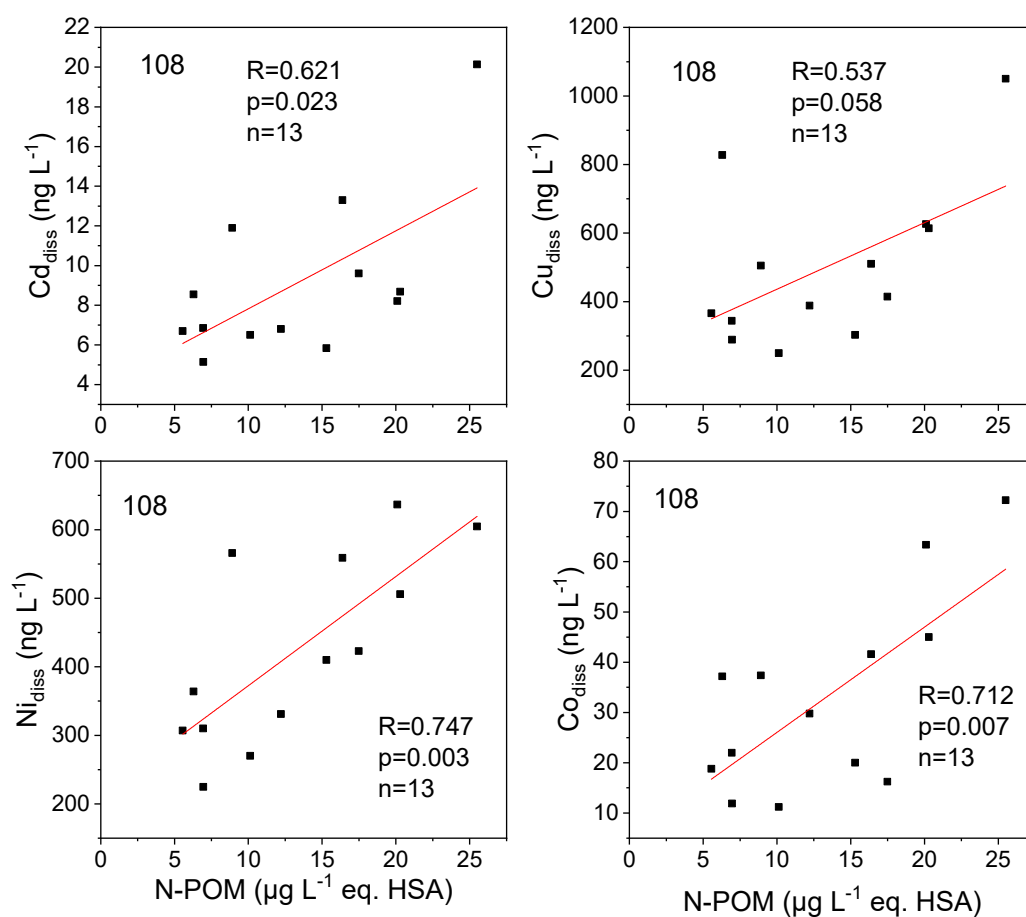

Figure S4. Nitrogen-containing polymeric organic material (N-POM) vs. cadmium, copper, nickel and cobalt for station 108.

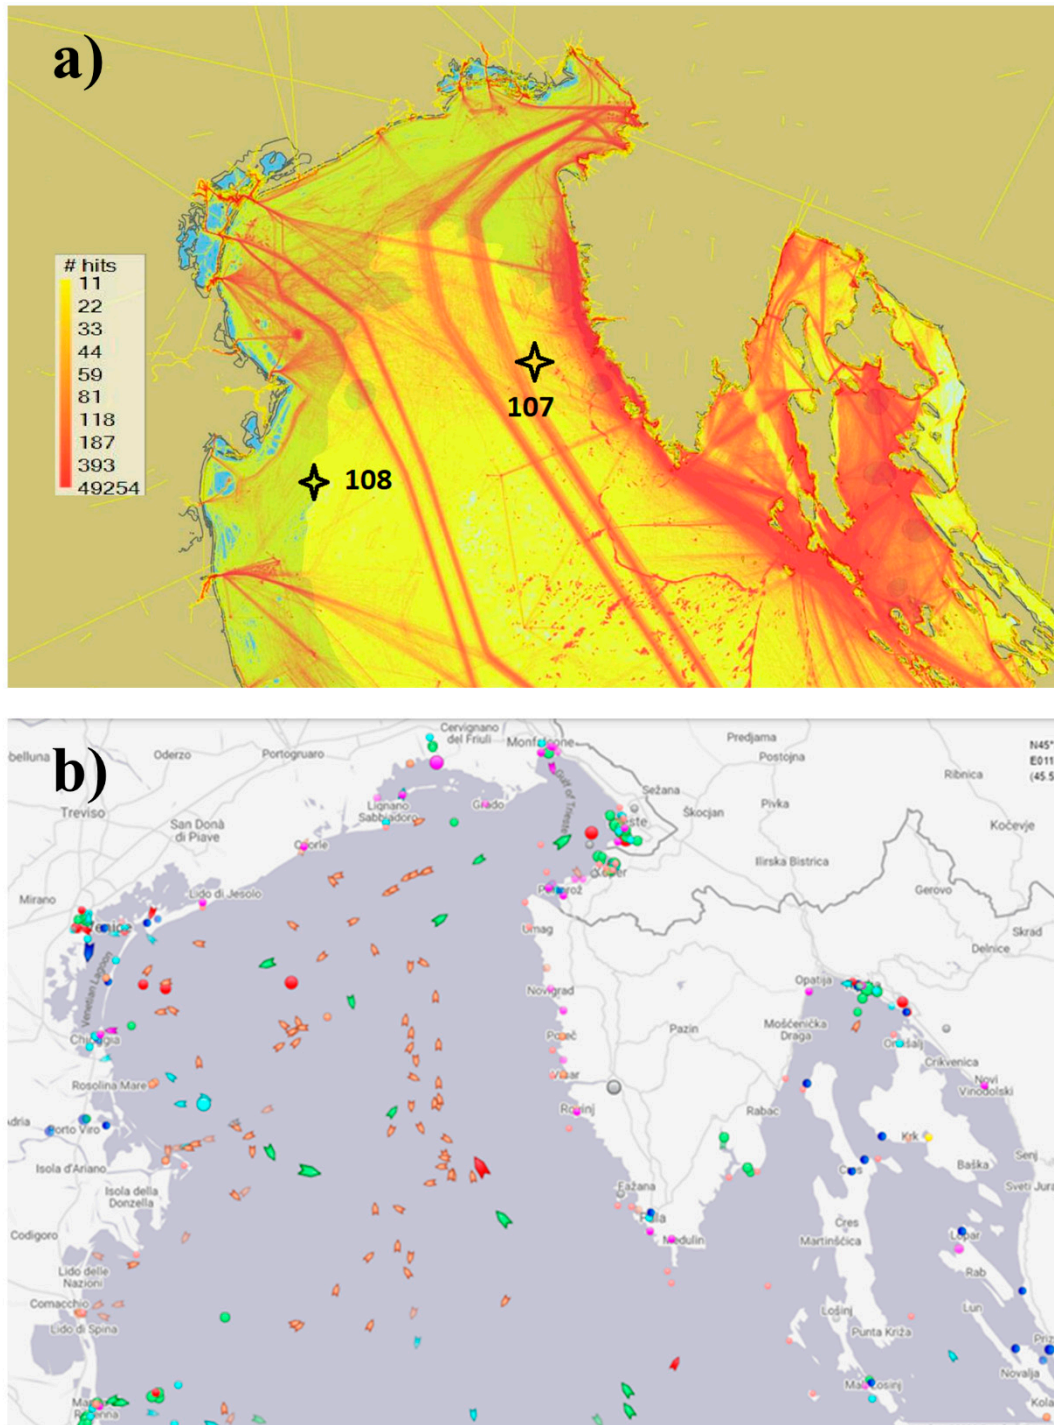

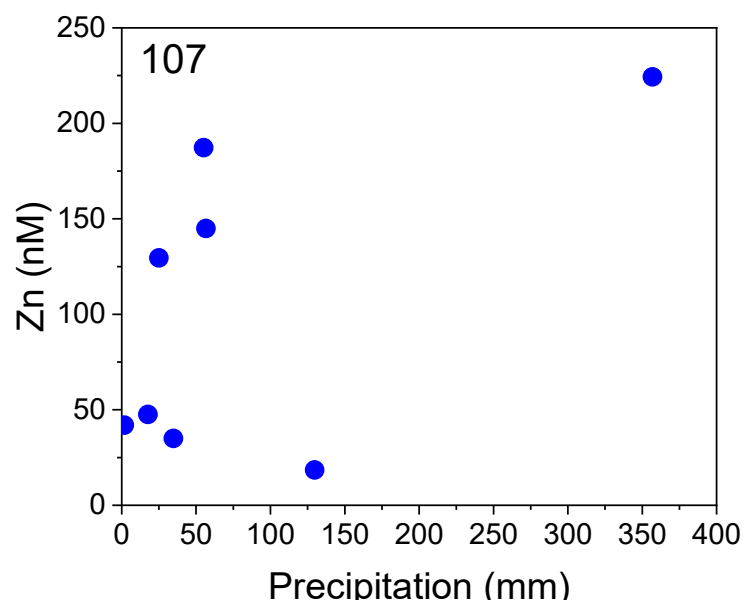

Figure S6. Dissolved Zn vs. precipitation at the surface of eastern station 107.

Table S1. Physico-chemical parameters at station 108 and 107 in the northern Adriatic.

| Date              | Depth<br>(m) | Station 108 |     |                                         |          | Station 107 |     |                                         |          |
|-------------------|--------------|-------------|-----|-----------------------------------------|----------|-------------|-----|-----------------------------------------|----------|
|                   |              | T<br>(°C)   | pH  | O <sub>2</sub><br>(ml L <sup>-1</sup> ) | Salinity | T<br>(°C)   | pH  | O <sub>2</sub><br>(ml L <sup>-1</sup> ) | Salinity |
| <i>16.11.2016</i> | 0            | 15.9        | 8.2 | 5.3                                     | 37.3     | 16.1        | 8.3 | 5.5                                     | 37.4     |
| <i>12.12.2016</i> | 0            | 12.7        | 8.3 | 5.8                                     | 36.0     | 14.8        | 8.3 | 5.5                                     | 38.3     |
| <i>27.1.2017</i>  | 0            | 8.8         | 8.3 | 6.3                                     | 38.1     | 8.1         | 8.3 | 6.8                                     | 37.4     |
| <i>28.3.2017</i>  | 0            | 13.7        | 8.6 | 7.9                                     | 34.2     | 11.4        | 8.3 | 6.1                                     | 38.3     |
| <i>3.5.2017</i>   | 0            | 15.4        | 8.4 | 6                                       | 35.8     | 15.5        | 8.3 | 5.9                                     | 37.1     |
| <i>12.6.2017</i>  | 0            | 25.1        | 8.4 | 6.4                                     | 31.3     | 23.7        | 8.2 | 5.1                                     | 36.2     |
| <i>12.7.2017</i>  | 0            | 28          | 8.3 | 5.2                                     | 32.5     | 26.1        | 8.2 | 4.8                                     | 36.0     |
| <i>30.8.2017</i>  | 0            | 27          | 8.2 | 4.8                                     | 36.6     | 26.4        | 8.2 | 4.8                                     | 36.4     |
| <i>4.10.2017</i>  | 0            |             |     |                                         |          | 20.8        | 8.2 | 5.1                                     | 38.0     |
| <i>16.11.2016</i> | 5            | 15.9        | 8.2 | 5.3                                     | 37.4     | 16.1        | 8.3 | 5.5                                     | 37.4     |
| <i>12.12.2016</i> | 5            | 13          | 8.3 | 5.8                                     | 36.7     | 14.8        | 8.3 | 5.5                                     | 38.3     |
| <i>27.1.2017</i>  | 5            | 8.8         | 8.3 | 6.3                                     | 38.1     | 8.6         | 8.3 | 6.6                                     | 37.5     |
| <i>28.3.2017</i>  | 5            | 12.4        | 8.6 | 7.9                                     | 34.9     | 11.3        | 8.3 | 6.2                                     | 38.3     |
| <i>3.5.2017</i>   | 5            | 14.9        | 8.4 | 6                                       | 35.9     | 14.6        | 8.3 | 5.9                                     | 37.3     |
| <i>12.6.2017</i>  | 5            | 22.7        | 8.3 | 5.3                                     | 35.6     | 23.2        | 8.2 | 5.1                                     | 36.4     |
| <i>12.7.2017</i>  | 5            | 26.3        | 8.3 | 5                                       | 33.9     | 26          | 8.2 | 4.8                                     | 36.1     |
| <i>30.8.2017</i>  | 5            | 27          | 8.2 | 4.8                                     | 36.6     | 26.5        | 8.2 | 4.9                                     | 36.6     |
| <i>4.10.2017</i>  | 5            |             |     |                                         |          | 20.8        | 8.2 | 5                                       | 38.0     |
| <i>16.11.2016</i> | 10           | 16.4        | 8.2 | 4.5                                     | 37.6     | 17.5        | 8.3 | 4.8                                     | 38.2     |
| <i>12.12.2016</i> | 10           | 13.6        | 8.3 | 5.7                                     | 37.7     | 14.8        | 8.3 | 5.6                                     | 38.3     |
| <i>27.1.2017</i>  | 10           | 9           | 8.3 | 6.3                                     | 38.3     | 9.2         | 8.3 | 6.5                                     | 37.9     |
| <i>28.3.2017</i>  | 10           | 9.1         | 8.2 | 6                                       | 37.8     | 11.3        | 8.3 | 6.2                                     | 38.3     |
| <i>3.5.2017</i>   | 10           | 14.8        | 8.4 | 6                                       | 35.9     | 14.5        | 8.3 | 6                                       | 37.3     |
| <i>12.6.2017</i>  | 10           | 21.6        | 8.3 | 5.4                                     | 36.4     | 22.5        | 8.2 | 5                                       | 36.8     |
| <i>12.7.2017</i>  | 10           | 22.1        | 8.2 | 5.3                                     | 36.6     | 26          | 8.2 | 4.8                                     | 36.1     |
| <i>30.8.2017</i>  | 10           | 26.4        | 8.2 | 4.8                                     | 37.7     | 26.1        | 8.2 | 4.8                                     | 37.0     |
| <i>4.10.2017</i>  | 10           |             |     |                                         |          | 20.8        | 8.2 | 5.1                                     | 38.0     |

Table S2. a) Daily precipitation (mm) at the Pontelagoscuro Station (44.88°N, 11.60°E). Data obtained from “Annali Idrologici” published by Hydrographic and Mareographic National Service of Italy (SIMN) and by the Regional Environmental Protection Agency of Emilia Romagna (ARPA; <http://www.arpa.emr.it/>).

b) Daily precipitation (mm) at Rovinj Station (45.10°N, 13.63°E). Data obtained from Croatian Meteorological and hydrological service ([www.meteo.hr](http://www.meteo.hr)).

| <b>a)</b>      | 2016 |     | 2017 |      |     |     |      |     |      |     |      |      |
|----------------|------|-----|------|------|-----|-----|------|-----|------|-----|------|------|
| Pontelagoscuro | Nov  | Dec | Jan  | Feb  | Mar | Apr | May  | Jun | Jul  | Aug | Sep  | Oct  |
| Day            | (mm) |     | (mm) |      |     |     |      |     |      |     |      |      |
| 1              | 0.2  | —   | 0.2  | —    | 1   | —   | —    | —   | —    | —   | 5.6  | —    |
| 2              | —    | 0.2 | 0.6  | —    | —   | —   | 2.4  | —   | —    | —   | —    | 4.2  |
| 3              | —    | —   | —    | 0.8  | —   | —   | 1.4  | —   | —    | —   | 10.6 | —    |
| 4              | —    | 0.8 | —    | 2.6  | —   | —   | 0.8  | —   | —    | —   | —    | —    |
| 5              | 0.6  | 0.8 | —    | 6.6  | —   | 0.4 | 3.8  | —   | —    | —   | —    | —    |
| 6              | 9.8  | 0.2 | —    | 29.4 | —   | —   | —    | —   | —    | —   | —    | —    |
| 7              | 0.2  | 0.2 | —    | 9.6  | 1   | —   | 23.2 | 1.4 | —    | 0.8 | —    | 10.2 |
| 8              | —    | 0.4 | —    | —    | 0.2 | —   | 1.2  | —   | —    | —   | 35.4 | —    |
| 9              | —    | 0.2 | —    | —    | —   | —   | 6.4  | —   | —    | —   | —    | —    |
| 10             | 1    | —   | —    | —    | —   | —   | —    | —   | —    | —   | 33   | 0.2  |
| 11             | —    | 0.4 | —    | —    | —   | —   | —    | —   | —    | 0.8 | 2.2  | —    |
| 12             | 15   | —   | —    | —    | —   | —   | —    | —   | 18.4 | —   | 5.6  | 0.2  |
| 13             | —    | 0.2 | 2    | —    | —   | —   | —    | —   | —    | —   | 2.2  | —    |
| 14             | —    | 0.2 | 5.6  | —    | —   | —   | 0.4  | —   | —    | —   | —    | 0.4  |
| 15             | 0.2  | —   | —    | —    | —   | —   | 3.2  | 8.2 | 4.8  | —   | 2    | 0.2  |
| 16             | —    | —   | —    | —    | —   | 4.4 | —    | —   | —    | —   | 9.4  | 0.2  |
| 17             | —    | 0.2 | 0.2  | —    | —   | 3.2 | —    | —   | —    | —   | —    | 0.2  |
| 18             | —    | 0.4 | —    | 4.2  | —   | —   | —    | —   | —    | —   | —    | 0.4  |
| 19             | 30.6 | —   | —    | 0.2  | —   | 2.2 | —    | —   | —    | —   | 21.4 | —    |
| 20             | 1.8  | 0.2 | —    | —    | —   | 0.2 | —    | —   | —    | —   | 6.2  | —    |
| 21             | 1    | 5   | —    | 0.4  | —   | —   | 0.4  | —   | —    | —   | —    | —    |
| 22             | —    | 0.2 | —    | —    | —   | —   | —    | —   | —    | —   | —    | —    |
| 23             | —    | 0.2 | —    | 0.2  | —   | —   | —    | —   | —    | —   | —    | 16.8 |
| 24             | 0.4  | 0.6 | —    | —    | —   | —   | —    | —   | —    | —   | —    | —    |
| 25             | 0.8  | —   | —    | 7.8  | —   | 1.4 | —    | —   | 20   | —   | 7.6  | —    |
| 26             | 12.4 | 0.2 | —    | —    | 7   | —   | —    | —   | »    | —   | —    | —    |
| 27             | 1.2  | 0.4 | —    | —    | 2   | 9   | —    | 0.6 | »    | —   | —    | —    |
| 28             | —    | 0.2 | —    | —    | —   | 5.8 | —    | 0.2 | —    | —   | —    | 0.2  |
| 29             | —    | —   | —    | —    | —   | —   | 7    | —   | —    | —   | —    | 0.2  |
| 30             | —    | —   | —    | —    | —   | —   | 0.2  | —   | —    | —   | —    | —    |
| 31             | —    | —   | 0.2  | —    | —   | —   | —    | —   | —    | —   | —    | —    |



|        |       |      |      |       |      |      |      |      |      |           |       |      |
|--------|-------|------|------|-------|------|------|------|------|------|-----------|-------|------|
| Total  | 75.2  | 11.4 | 8.8  | 61.8  | 11.2 | 26.6 | 43.2 | 17.6 | 1.6  | 141.<br>2 | 33.2  |      |
| b)     | 2016  |      | 2017 |       |      |      |      |      |      |           |       |      |
| Rovinj | Nov   | Dec  | Jan  | Feb   | Mar  | Apr  | May  | Jun  | Jul  | Aug       | Sep   | Oct  |
| Day    | (mm)  |      | (mm) |       |      |      |      |      |      |           |       |      |
| 1      | —     | —    | —    | 28.5  | 1.9  | —    | —    | —    | 0.8  | —         | 7.8   | —    |
| 2      | —     | —    | —    | 7.1   | 4.5  | —    | 0.6  | —    | —    | —         | 7.5   | —    |
| 3      | 0.1   | —    | 0.8  | 6.6   | —    | —    | —    | —    | 0.3  | —         | 9.3   | —    |
| 4      | —     | 1.7  | —    | 8.9   | —    | —    | —    | —    | —    | —         | 4.1   | 1.3  |
| 5      | 5.2   | 0.1  | —    | 11.4  | 3.8  | —    | 18.5 | —    | —    | —         | 4     | —    |
| 6      | 30.4  | —    | —    | 21.1  | 1.1  | 1.4  | —    | 0.1  | —    | —         | —     | —    |
| 7      | 5.2   | —    | —    | 1.5   | 7.8  | 7.3  | 17   | 1    | —    | 25.4      | 0.1   | 5.6  |
| 8      | 5.6   | —    | —    | —     | —    | —    | 0.4  | 7.2  | —    | —         | 65    | —    |
| 9      | 0.0   | —    | —    | —     | —    | —    | 0.5  | —    | 0    | —         | —     | —    |
| 10     | 0.2   | —    | —    | —     | —    | —    | 0.2  | —    | —    | 0.1       | 1     | —    |
| 11     | 0.9   | —    | —    | 0.6   | —    | —    | 1.3  | —    | —    | 3.3       | 115.6 | —    |
| 12     | 30.1  | —    | —    | —     | —    | —    | —    | —    | 3.6  | 2.4       | 15.8  | —    |
| 13     | 0.0   | —    | 9.8  | —     | —    | —    | 2.1  | —    | —    | 0.3       | 5.6   | —    |
| 14     | —     | —    | 6.2  | —     | —    | —    | —    | —    | —    | —         | —     | —    |
| 15     | —     | —    | —    | —     | —    | —    | —    | 1.6  | 0.1  | —         | —     | —    |
| 16     | —     | —    | —    | —     | —    | 7.4  | 0    | —    | —    | —         | 40.5  | —    |
| 17     | —     | —    | —    | —     | —    | 6.8  | —    | —    | —    | —         | 5.2   | —    |
| 18     | 2.3   | —    | —    | 13.2  | —    | —    | —    | —    | —    | —         | 1.2   | —    |
| 19     | 2.6   | —    | —    | —     | —    | 15.6 | —    | —    | —    | —         | 17.2  | —    |
| 20     | 15.6  | —    | —    | —     | —    | —    | 3.1  | —    | —    | 17.3      | 15.8  | —    |
| 21     | 2.6   | —    | —    | —     | —    | —    | 10.6 | —    | —    | —         | —     | —    |
| 22     | 0.1   | —    | —    | —     | —    | —    | —    | —    | 0    | —         | —     | —    |
| 23     | 0.2   | —    | —    | —     | —    | —    | —    | —    | —    | —         | —     | 11.7 |
| 24     | —     | —    | —    | —     | —    | —    | —    | —    | —    | —         | —     | 0.6  |
| 25     | 5.2   | —    | —    | 26.3  | —    | —    | 2.4  | —    | 5.1  | —         | 39.6  | —    |
| 26     | 16.8  | —    | —    | —     | —    | —    | —    | 9.8  | —    | —         | 1.6   | —    |
| 27     | 6.7   | —    | —    | —     | 6    | 0.5  | —    | 0.1  | —    | —         | —     | —    |
| 28     | —     | —    | —    | —     | —    | 24.9 | —    | 0    | —    | 0         | —     | —    |
| 29     | —     | —    | —    | —     | —    | 3.7  | —    | 15   | —    | 6.3       | —     | —    |
| 30     | —     | —    | —    | —     | —    | —    | —    | —    | —    | —         | —     | —    |
| 31     | —     | —    | 0.9  | —     | —    | —    | —    | —    | 0.6  | —         | —     | —    |
| Total  | 129.8 | 1.8  | 17.7 | 125.2 | 25.1 | 67.6 | 56.7 | 34.8 | 10.5 | 55.1      | 356.9 | 19.2 |

Table S3. Nutrient concentrations at stations 108 and 107 in the northern Adriatic.

|            |       | Station 108          |      |                 |                 |                 |                  |                 | Station 107 |                 |                 |                 |                  |
|------------|-------|----------------------|------|-----------------|-----------------|-----------------|------------------|-----------------|-------------|-----------------|-----------------|-----------------|------------------|
| Date       | Depth | PO <sub>4</sub>      | OrgP | NO <sub>3</sub> | NO <sub>2</sub> | NH <sub>4</sub> | SiO <sub>4</sub> | PO <sub>4</sub> | OrgP        | NO <sub>3</sub> | NO <sub>2</sub> | NH <sub>4</sub> | SiO <sub>4</sub> |
|            | (m)   | μmol L <sup>-1</sup> |      |                 |                 |                 |                  |                 |             |                 |                 |                 |                  |
| 16.11.2016 | 0     | 0.05                 | 0.29 | 2.23            | 0.52            | 0.17            | 9.12             | 0.05            | 0.31        | 1.49            | 0.33            | 0.18            | 3.04             |
| 12.12.2016 | 0     | 0.04                 | 0.31 | 5.93            | 1.19            | 0.43            | 9.49             | 0.05            | 0.12        | 0.94            | 0.64            | 0.24            | 2.92             |
| 27.1.2017  | 0     | 0.07                 | 0.10 | 1.59            | 0.59            | 0.17            | 4.11             | 0.09            | 0.14        | 2.76            | 0.75            | 0.23            | 6.36             |
| 28.3.2017  | 0     | 0.12                 | 0.28 | 3.14            | 0.38            | 0.28            | 0.13             | 0.03            | 0.19        | 0.19            | 0.09            | 0.17            | 4.70             |
| 3.5.2017   | 0     | 0.10                 | 0.18 | 0.22            | 0.20            | 0.20            | 0.60             | 0.14            | 0.14        | 0.11            | 0.05            | 0.39            | 1.81             |
| 12.6.2017  | 0     | 0.11                 | 0.39 | 0.37            | 0.11            | 0.59            | 3.00             |                 | 0.19        | 0.08            | 0.05            | 0.25            | 3.15             |
| 12.7.2017  | 0     | 0.05                 | 0.31 | 0.09            | 0.06            | 0.27            | 0.23             |                 | 0.19        | 0.20            | 0.01            | 0.59            | 0.84             |
| 30.8.2017  | 0     |                      | 0.52 | 0.12            | 0.02            | 0.14            | 0.64             |                 | 0.25        | 0.18            | 0.02            | 0.30            | 0.23             |
| 4.10.2017  | 0     |                      |      |                 |                 |                 |                  |                 | 0.15        | 0.22            | 0.02            | 0.35            | 0.18             |
| 16.11.2016 | 5     | 0.07                 | 0.33 | 2.53            | 0.49            | 0.15            | 9.56             |                 | 0.26        | 1.60            | 0.32            | 0.17            | 4.95             |
| 12.12.2016 | 5     |                      | 0.32 | 4.89            | 1.08            | 0.12            | 8.13             | 0.04            | 0.12        | 0.90            | 0.70            | 0.23            | 2.90             |
| 27.1.2017  | 5     | 0.07                 | 0.10 | 1.79            | 0.60            | 0.17            | 3.95             | 0.10            | 0.15        | 2.77            | 0.73            | 0.14            | 5.82             |
| 28.3.2017  | 5     | 0.08                 | 0.26 | 2.55            | 0.38            | 0.53            | 0.12             | 0.03            | 0.17        | 0.18            | 0.09            | 0.28            | 0.63             |
| 3.5.2017   | 5     | 0.11                 | 0.13 | 0.22            | 0.19            | 0.16            | 0.63             | 0.06            | 0.12        | 0.10            | 0.03            | 0.24            | 0.38             |
| 12.6.2017  | 5     | 0.05                 | 0.14 | 0.20            | 0.04            | 0.52            | 2.45             |                 | 0.13        | 0.10            | 0.05            | 0.35            | 3.18             |
| 12.7.2017  | 5     |                      | 0.25 | 0.12            | 0.01            | 0.25            | 0.19             | 0.04            | 0.15        | 0.10            | 0.02            | 0.43            | 0.70             |
| 30.8.2017  | 5     |                      | 0.46 | 0.10            | 0.02            | 0.14            | 0.60             |                 | 0.31        | 0.08            | 0.02            | 0.29            | 0.36             |
| 4.10.2017  | 5     |                      |      |                 |                 |                 |                  |                 | 0.13        | 0.10            | 0.01            | 0.25            | 0.27             |
| 16.11.2016 | 10    | 0.08                 | 0.26 | 3.55            | 0.46            | 0.11            | 13.37            | 0.07            | 0.17        | 1.55            | 0.33            | 0.18            | 3.29             |
| 12.12.2016 | 10    |                      | 0.32 | 1.57            | 0.56            | 0.13            | 5.92             | 0.04            | 0.19        | 0.86            | 0.67            | 0.22            | 2.96             |
| 27.1.2017  | 10    | 0.04                 | 0.14 | 1.54            | 0.59            | 0.17            | 3.31             | 0.10            | 0.16        | 1.51            | 0.73            | 0.15            | 4.66             |
| 28.3.2017  | 10    | 0.03                 | 0.20 | 1.37            | 0.22            | 0.85            | 0.75             | 0.03            | 0.20        | 0.20            | 0.08            | 0.30            | 0.75             |
| 3.5.2017   | 10    | 0.07                 | 0.20 | 0.25            | 0.17            | 0.16            | 0.67             | 0.11            | 0.09        | 0.18            | 0.02            | 0.21            | 0.56             |
| 12.6.2017  | 10    | 0.06                 | 0.15 | 0.10            | 0.04            | 0.39            | 2.60             |                 | 0.14        | 0.10            | 0.05            | 0.41            | 2.51             |
| 12.7.2017  | 10    |                      | 0.25 | 0.10            | 0.01            | 0.28            | 0.30             | 0.06            | 0.08        | 0.23            | 0.01            | 0.49            | 0.70             |
| 30.8.2017  | 10    |                      | 0.21 | 0.21            | 0.01            | 0.15            | 0.88             |                 | 0.22        | 0.08            | 0.01            | 0.29            | 0.67             |
| 4.10.2017  | 10    |                      |      |                 |                 |                 |                  |                 | 0.18        | 0.11            | 0.01            | 0.26            | 0.30             |

Table S4. Chl *a* at stations 108 and 107 in the northern Adriatic.

| Date              | Depth<br>m | Station 108                          | Station 107                          |
|-------------------|------------|--------------------------------------|--------------------------------------|
|                   |            | Chl <i>a</i><br>$\mu\text{g L}^{-1}$ | Chl <i>a</i><br>$\mu\text{g L}^{-1}$ |
| <i>16.11.2016</i> | 0          | 2.41                                 | 2.09                                 |
| <i>12.12.2016</i> | 0          | 0.87                                 | 0.46                                 |
| <i>27.1.2017</i>  | 0          | 0.81                                 | 0.97                                 |
| <i>28.3.2017</i>  | 0          | 3.09                                 | 0.23                                 |
| <i>3.5.2017</i>   | 0          | 0.49                                 | 0.41                                 |
| <i>12.6.2017</i>  | 0          | 2.44                                 | 0.11                                 |
| <i>12.7.2017</i>  | 0          | 0.55                                 | 0.16                                 |
| <i>30.8.2017</i>  | 0          | 0.21                                 | 0.17                                 |
| <i>4.10.2017</i>  | 0          |                                      | 0.23                                 |
| <i>16.11.2016</i> | 5          | 2.34                                 | 2.14                                 |
| <i>12.12.2016</i> | 5          | 0.89                                 | 0.46                                 |
| <i>27.1.2017</i>  | 5          | 0.77                                 | 0.94                                 |
| <i>28.3.2017</i>  | 5          | 2.78                                 | 0.26                                 |
| <i>3.5.2017</i>   | 5          | 0.45                                 | 0.41                                 |
| <i>12.6.2017</i>  | 5          | 0.42                                 | 0.12                                 |
| <i>12.7.2017</i>  | 5          | 0.52                                 | 0.18                                 |
| <i>30.8.2017</i>  | 5          | 0.17                                 | 0.19                                 |
| <i>4.10.2017</i>  | 5          |                                      | 0.24                                 |
| <i>16.11.2016</i> | 10         | 1.80                                 | 0.53                                 |
| <i>12.12.2016</i> | 10         | 0.88                                 | 0.41                                 |
| <i>27.1.2017</i>  | 10         | 0.80                                 | 0.98                                 |
| <i>28.3.2017</i>  | 10         | 0.76                                 | 0.27                                 |
| <i>3.5.2017</i>   | 10         | 0.48                                 | 0.42                                 |
| <i>12.6.2017</i>  | 10         | 0.45                                 | 0.13                                 |
| <i>12.7.2017</i>  | 10         | 0.50                                 | 0.20                                 |
| <i>30.8.2017</i>  | 10         | 0.20                                 | 0.15                                 |
| <i>4.10.2017</i>  | 10         |                                      | 0.26                                 |

Table S5. DOC, SAS and N-POM concentrations at stations 108 and 107 in the northern Adriatic.

| Date              | Depth<br>m | Station 108               |                                          |                                        | Station 107               |                                          |                                        |
|-------------------|------------|---------------------------|------------------------------------------|----------------------------------------|---------------------------|------------------------------------------|----------------------------------------|
|                   |            | DOC<br>mg L <sup>-1</sup> | SAS<br>mg L <sup>-1</sup><br>eq. T-X-100 | N-POM<br>µg L <sup>-1</sup><br>eq. HSA | DOC<br>mg L <sup>-1</sup> | SAS<br>mg L <sup>-1</sup><br>eq. T-X-100 | N-POM<br>µg L <sup>-1</sup><br>eq. HSA |
| <i>16.11.2016</i> | 0          | 1.14                      | 0.20                                     |                                        | 1.23                      | 0.11                                     |                                        |
| <i>12.12.2016</i> | 0          | 1.06                      | 0.09                                     |                                        | 1.00                      | 0.09                                     |                                        |
| <i>27.1.2017</i>  | 0          | 1.05                      | 0.14                                     |                                        | 1.09                      | 0.14                                     |                                        |
| <i>28.3.2017</i>  | 0          | 1.71                      | 0.30                                     | 25.51                                  | 1.10                      | 0.11                                     |                                        |
| <i>3.5.2017</i>   | 0          | 1.71                      | 0.14                                     | 8.92                                   | 2.06                      | 0.19                                     | 8.93                                   |
| <i>12.6.2017</i>  | 0          | 2.02                      | 0.24                                     | 20.30                                  | 1.59                      | 0.14                                     | 3.61                                   |
| <i>12.7.2017</i>  | 0          | 2.09                      | 0.14                                     | 6.30                                   | 3.09                      | 0.16                                     | 13.53                                  |
| <i>30.8.2017</i>  | 0          | 1.59                      | 0.14                                     |                                        | 1.77                      | 0.18                                     | 13.22                                  |
| <i>4.10.2017</i>  | 0          |                           |                                          |                                        | 1.82                      | 0.13                                     |                                        |
| <i>16.11.2016</i> | 5          | 1.17                      | 0.23                                     |                                        | 1.12                      | 0.12                                     |                                        |
| <i>12.12.2016</i> | 5          | 1.06                      | 0.13                                     |                                        | 0.98                      | 0.09                                     |                                        |
| <i>27.1.2017</i>  | 5          | 1.04                      | 0.10                                     |                                        | 1.26                      | 0.14                                     |                                        |
| <i>28.3.2017</i>  | 5          | 1.79                      | 0.22                                     | 20.10                                  | 1.23                      | 0.14                                     | 4.66                                   |
| <i>3.5.2017</i>   | 5          | 1.80                      | 0.18                                     | 17.48                                  | 1.41                      | 0.16                                     | 6.42                                   |
| <i>12.6.2017</i>  | 5          | 1.85                      | 0.18                                     | 15.30                                  | 1.69                      | 0.16                                     | 14.20                                  |
| <i>12.7.2017</i>  | 5          | 1.98                      | 0.18                                     | 12.22                                  | 1.68                      | 0.16                                     | 16.07                                  |
| <i>30.8.2017</i>  | 5          | 1.59                      | 0.16                                     | 5.55                                   | 1.54                      | 0.17                                     | 16.04                                  |
| <i>4.10.2017</i>  | 5          |                           |                                          |                                        | 1.29                      | 0.12                                     |                                        |
| <i>16.11.2016</i> | 10         | 1.11                      | 0.16                                     |                                        | 1.12                      | 0.13                                     |                                        |
| <i>12.12.2016</i> | 10         | 0.97                      | 0.14                                     |                                        | 0.96                      | 0.08                                     |                                        |
| <i>27.1.2017</i>  | 10         | 1.04                      | 0.14                                     |                                        | 1.05                      | 0.15                                     | 9.24                                   |
| <i>28.3.2017</i>  | 10         | 1.07                      | 0.11                                     |                                        | 1.03                      | 0.16                                     |                                        |
| <i>3.5.2017</i>   | 10         | 1.74                      | 0.18                                     | 16.39                                  | 1.35                      | 0.12                                     | 4.80                                   |
| <i>12.6.2017</i>  | 10         | 1.70                      | 0.14                                     | 6.96                                   | 1.76                      | 0.16                                     | 8.60                                   |
| <i>12.7.2017</i>  | 10         | 1.48                      | 0.13                                     | 6.94                                   | 1.63                      | 0.15                                     | 12.76                                  |
| <i>30.8.2017</i>  | 10         | 1.42                      | 0.12                                     | 10.13                                  | 1.45                      | 0.13                                     | 6.17                                   |
| <i>4.10.2017</i>  | 10         |                           |                                          |                                        | 1.29                      | 0.13                                     |                                        |

Table S6. Concentrations of dissolved and total trace metals at station 108 at the western side of the northern Adriatic.

| <i>Station 108</i> |              |                |             |             |            |            |             |
|--------------------|--------------|----------------|-------------|-------------|------------|------------|-------------|
| <i>Date</i>        | Depth<br>(m) | Zn             | Cd          | Pb          | Cu         | Ni         | Co          |
|                    |              | Dissolved (nM) |             |             |            |            |             |
| <i>16.11.2016</i>  | 0            | 7.5 ± 0.6      | 0.07 ± 0.01 | 0.07 ± 0.01 | 14.3 ± 0.8 | 7.9 ± 0.7  | 0.31 ± 0.04 |
| <i>12.12.2016</i>  | 0            | 10.2 ± 0.9     | 0.08 ± 0.00 | 0.07 ± 0.02 | 4.4 ± 0.4  | 8.7 ± 0.0  | 0.22 ± 0.03 |
| <i>27.1.2017</i>   | 0            | 16.0 ± 0.8     | 0.05 ± 0.00 | 0.10 ± 0.01 | 7.0 ± 0.7  | 7.6 ± 0.7  | 0.29 ± 0.02 |
| <i>28.3.2017</i>   | 0            | 32.8 ± 4.3     | 0.18 ± 0.05 | 0.40 ± 0.19 | 16.5 ± 0.8 | 10.3 ± 0.9 | 1.23 ± 0.16 |
| <i>3.5.2017</i>    | 0            | 15.1 ± 0.6     | 0.11 ± 0.02 | 0.19 ± 0.05 | 8.0 ± 0.0  | 9.6 ± 0.5  | 0.63 ± 0.06 |
| <i>12.6.2017</i>   | 0            | 37.9 ± 0.9     | 0.08 ± 0.01 | 0.13 ± 0.01 | 9.7 ± 0.6  | 8.6 ± 0.5  | 0.76 ± 0.05 |
| <i>12.7.2017</i>   | 0            | 95.5 ± 3.4     | 0.08 ± 0.01 | 0.08 ± 0.00 | 13.0 ± 0.9 | 6.2 ± 0.4  | 0.63 ± 0.05 |
| <i>30.8.2017</i>   | 0            | 56.6 ± 4.4     | 0.07 ± 0.01 | 0.15 ± 0.01 | 5.7 ± 0.3  | 5.4 ± 0.4  | 0.33 ± 0.02 |
| <i>16.11.2016</i>  | 5            | 8.4 ± 1.0      | 0.06 ± 0.00 | 0.06 ± 0.01 | 3.7 ± 0.4  | 8.0 ± 0.8  | 0.33 ± 0.03 |
| <i>12.12.2016</i>  | 5            | 11.3 ± 0.7     | 0.09 ± 0.00 | 0.06 ± 0.01 | 4.5 ± 0.1  | 7.6 ± 0.8  | 0.22 ± 0.03 |
| <i>27.1.2017</i>   | 5            | 5.1 ± 0.5      | 0.05 ± 0.00 | 0.07 ± 0.01 | 3.0 ± 0.3  | 7.2 ± 0.4  | 0.27 ± 0.03 |
| <i>28.3.2017</i>   | 5            | 10.8 ± 0.7     | 0.07 ± 0.06 | 0.11 ± 0.03 | 9.9 ± 0.4  | 10.8 ± 0.5 | 1.08 ± 0.06 |
| <i>3.5.2017</i>    | 5            | 116.0 ± 2.5    | 0.09 ± 0.01 | 0.17 ± 0.01 | 6.5 ± 0.5  | 7.2 ± 0.5  | 0.28 ± 0.03 |
| <i>12.6.2017</i>   | 5            | 74.1 ± 4.7     | 0.05 ± 0.00 | 0.09 ± 0.00 | 4.8 ± 0.7  | 7.0 ± 0.4  | 0.34 ± 0.08 |
| <i>12.7.2017</i>   | 5            | 42.2 ± 5.1     | 0.06 ± 0.00 | 0.04 ± 0.01 | 6.1 ± 0.5  | 5.6 ± 0.6  | 0.51 ± 0.05 |
| <i>30.8.2017</i>   | 5            | 21.3 ± 2.4     | 0.06 ± 0.01 | 0.62 ± 0.01 | 5.8 ± 0.7  | 5.2 ± 0.4  | 0.32 ± 0.03 |
| <i>16.11.2016</i>  | 10           | 10.3 ± 0.6     | 0.07 ± 0.01 | 0.08 ± 0.01 | 3.8 ± 0.0  | 6.5 ± 0.7  | 0.21 ± 0.02 |
| <i>12.12.2016</i>  | 10           | 4.6 ± 0.5      | 0.05 ± 0.00 | 0.06 ± 0.01 | 3.4 ± 0.4  | 6.1 ± 0.5  | 0.23 ± 0.02 |
| <i>27.1.2017</i>   | 10           | 7.8 ± 0.7      | 0.04 ± 0.00 | 0.07 ± 0.02 | 3.6 ± 0.3  | 6.8 ± 0.6  | 0.26 ± 0.01 |
| <i>28.3.2017</i>   | 10           | 10.4 ± 0.8     | 0.08 ± 0.02 | 0.06 ± 0.02 | 5.6 ± 0.6  | 7.7 ± 0.4  | 0.41 ± 0.04 |
| <i>3.5.2017</i>    | 10           | 9.7 ± 0.2      | 0.12 ± 0.01 | 0.16 ± 0.02 | 8.0 ± 0.8  | 9.5 ± 0.7  | 0.71 ± 0.04 |
| <i>12.6.2017</i>   | 10           | 37.5 ± 3.4     | 0.05 ± 0.00 | 0.09 ± 0.01 | 4.5 ± 0.9  | 3.8 ± 0.9  | 0.20 ± 0.02 |
| <i>12.7.2017</i>   | 10           | 12.6 ± 1.6     | 0.06 ± 0.01 | 0.05 ± 0.01 | 5.4 ± 1.1  | 5.3 ± 0.4  | 0.37 ± 0.00 |
| <i>30.8.2017</i>   | 10           | 39.7 ± 2.6     | 0.06 ± 0.01 | 0.11 ± 0.01 | 3.9 ± 0.2  | 4.6 ± 0.4  | 0.19 ± 0.02 |
|                    |              | Total (nM)     |             |             |            |            |             |
| <i>16.11.2016</i>  | 0            | 17.5 ± 0.3     | 0.06 ± 0.01 | 0.50 ± 0.06 | 26.5 ± 1.3 | 11.6 ± 0.8 | 0.92 ± 0.05 |
| <i>12.12.2016</i>  | 0            | 11.6 ± 0.2     | 0.08 ± 0.00 | 0.26 ± 0.01 | 8.3 ± 0.1  | 8.9 ± 1.0  | 0.73 ± 0.08 |
| <i>27.1.2017</i>   | 0            | 16.7 ± 0.3     | 0.06 ± 0.01 | 0.37 ± 0.01 | 9.8 ± 0.5  | 10.6 ± 0.4 | 0.58 ± 0.02 |
| <i>28.3.2017</i>   | 0            | 36.4 ± 1.8     | 0.14 ± 0.01 | 0.67 ± 0.14 | 24.6 ± 2.3 | 12.3 ± 1.2 | 1.28 ± 0.08 |
| <i>3.5.2017</i>    | 0            | 16.4 ± 0.5     | 0.13 ± 0.01 | 0.29 ± 0.02 | 10.0 ± 0.3 | 11.1 ± 0.8 | 0.91 ± 0.09 |
| <i>12.6.2017</i>   | 0            | 62.5 ± 2.9     | 0.09 ± 0.00 | 0.45 ± 0.03 | 12.8 ± 1.4 | 13.3 ± 1.0 | 0.87 ± 0.06 |
| <i>12.7.2017</i>   | 0            | 101.4 ± 8.4    | 0.08 ± 0.01 | 0.35 ± 0.03 | 15.7 ± 2.9 | 7.4 ± 0.9  | 0.74 ± 0.00 |
| <i>30.8.2017</i>   | 0            | 57.5 ± 4.8     | 0.08 ± 0.01 | 0.18 ± 0.02 | 9.4 ± 1.2  | 5.8 ± 0.3  | 0.35 ± 0.01 |
| <i>16.11.2016</i>  | 5            | 12.1 ± 1.5     | 0.06 ± 0.00 | 0.27 ± 0.02 | 6.9 ± 0.6  | 8.9 ± 0.4  | 0.68 ± 0.08 |
| <i>12.12.2016</i>  | 5            | 13.3 ± 0.8     | 0.10 ± 0.00 | 0.27 ± 0.02 | 8.7 ± 0.6  | 8.5 ± 1.3  | 0.62 ± 0.05 |
| <i>27.1.2017</i>   | 5            | 7.0 ± 1.0      | 0.06 ± 0.00 | 0.27 ± 0.02 | 5.7 ± 0.6  | 8.3 ± 0.6  | 0.46 ± 0.03 |

|                   |    |                 |                 |                 |                |                |                 |
|-------------------|----|-----------------|-----------------|-----------------|----------------|----------------|-----------------|
| <i>28.3.2017</i>  | 5  | $12.7 \pm 0.8$  | $0.13 \pm 0.02$ | $0.19 \pm 0.01$ | $10.3 \pm 0.8$ | $11.5 \pm 1.7$ | $1.15 \pm 0.08$ |
| <i>3.5.2017</i>   | 5  | $119.4 \pm 5.3$ | $0.09 \pm 0.01$ | $0.25 \pm 0.03$ | $7.7 \pm 0.6$  | $8.3 \pm 0.3$  | $0.39 \pm 0.05$ |
| <i>12.6.2017</i>  | 5  | $103.7 \pm 7.2$ | $0.06 \pm 0.01$ | $0.13 \pm 0.01$ | $5.2 \pm 1.1$  | $7.2 \pm 0.5$  | $0.39 \pm 0.04$ |
| <i>12.7.2017</i>  | 5  | $45.4 \pm 2.4$  | $0.07 \pm 0.01$ | $0.12 \pm 0.01$ | $10.1 \pm 1.0$ | $6.8 \pm 0.5$  | $0.58 \pm 0.01$ |
| <i>30.8.2017</i>  | 5  | $21.8 \pm 1.5$  | $0.06 \pm 0.01$ | $0.76 \pm 0.07$ | $7.1 \pm 0.3$  | $5.3 \pm 0.1$  | $0.39 \pm 0.02$ |
| <i>16.11.2016</i> | 10 | $13.4 \pm 1.1$  | $0.07 \pm 0.01$ | $0.41 \pm 0.06$ | $11.5 \pm 0.9$ | $9.4 \pm 0.4$  | $0.85 \pm 0.06$ |
| <i>12.12.2016</i> | 10 | $6.1 \pm 0.4$   | $0.07 \pm 0.00$ | $0.24 \pm 0.05$ | $6.5 \pm 0.1$  | $7.0 \pm 0.3$  | $0.44 \pm 0.04$ |
| <i>27.1.2017</i>  | 10 | $11.1 \pm 0.9$  | $0.05 \pm 0.00$ | $0.24 \pm 0.03$ | $5.5 \pm 0.5$  | $8.0 \pm 0.6$  | $0.44 \pm 0.05$ |
| <i>28.3.2017</i>  | 10 | $11.3 \pm 0.5$  | $0.13 \pm 0.01$ | $0.11 \pm 0.02$ | $8.2 \pm 0.7$  | $7.4 \pm 0.4$  | $0.45 \pm 0.02$ |
| <i>3.5.2017</i>   | 10 | $10.6 \pm 0.4$  | $0.12 \pm 0.01$ | $0.71 \pm 0.03$ | $19.0 \pm 0.7$ | $15.3 \pm 0.6$ | $0.89 \pm 0.06$ |
| <i>12.6.2017</i>  | 10 | $38.9 \pm 2.6$  | $0.05 \pm 0.01$ | $0.12 \pm 0.01$ | $5.6 \pm 0.7$  | $4.2 \pm 0.6$  | $0.20 \pm 0.03$ |
| <i>12.7.2017</i>  | 10 | $13.2 \pm 0.8$  | $0.07 \pm 0.01$ | $0.06 \pm 0.01$ | $6.2 \pm 0.3$  | $5.5 \pm 0.5$  | $0.39 \pm 0.03$ |
| <i>30.8.2017</i>  | 10 | $46.5 \pm 4.1$  | $0.06 \pm 0.00$ | $0.12 \pm 0.01$ | $5.2 \pm 0.3$  | $4.8 \pm 0.2$  | $0.21 \pm 0.02$ |

Table S7. Concentrations of dissolved and total TM at station 107 at the eastern side of the northern Adriatic.

| <i>Station 107</i> |              |                |             |             |            |            |             |
|--------------------|--------------|----------------|-------------|-------------|------------|------------|-------------|
| <i>Date</i>        | Depth<br>(m) | Zn             | Cd          | Pb          | Cu         | Ni         | Co          |
|                    |              | Dissolved (nM) |             |             |            |            |             |
| <i>16.11.2016</i>  | 0            | 18.4 ± 1.1     | 0.06 ± 0.01 | 0.07 ± 0.01 | 4.2 ± 0.5  | 7.0 ± 0.3  | 0.35 ± 0.03 |
| <i>12.12.2016</i>  | 0            | 42.0 ± 2.2     | 0.05 ± 0.00 | 0.09 ± 0.02 | 9.7 ± 0.8  | 6.9 ± 0.7  | 0.21 ± 0.02 |
| <i>27.1.2017</i>   | 0            | 47.6 ± 0.9     | 0.07 ± 0.01 | 0.12 ± 0.00 | 8.5 ± 0.3  | 9.1 ± 0.7  | 0.42 ± 0.05 |
| <i>28.3.2017</i>   | 0            | 129.5 ± 12.2   | 0.09 ± 0.01 | 0.19 ± 0.03 | 9.7 ± 1.3  | 7.3 ± 0.4  | 0.28 ± 0.03 |
| <i>3.5.2017</i>    | 0            | 144.9 ± 14.2   | 0.10 ± 0.01 | 0.25 ± 0.02 | 8.5 ± 0.3  | 8.4 ± 0.6  | 0.46 ± 0.06 |
| <i>12.6.2017</i>   | 0            | 35.0 ± 6.0     | 0.16 ± 0.02 | 0.45 ± 0.05 | 15.0 ± 2.1 | 7.4 ± 0.5  | 0.38 ± 0.05 |
| <i>12.7.2017</i>   | 0            | 1082 ± 103     | 0.10 ± 0.01 | 0.30 ± 0.02 | 7.3 ± 1.1  | 6.3 ± 0.6  | 0.20 ± 0.02 |
| <i>30.8.2017</i>   | 0            | 187.2 ± 0.6    | 0.08 ± 0.01 | 0.41 ± 0.03 | 14.2 ± 0.9 | 7.4 ± 0.6  | 0.34 ± 0.01 |
| <i>4.10.2017</i>   | 0            | 224.3 ± 24.1   | 0.05 ± 0.00 | 0.16 ± 0.04 | 4.5 ± 0.3  | 5.3 ± 0.8  | 0.16 ± 0.04 |
| <i>16.11.2016</i>  | 5            | 10.1 ± 0.8     | 0.05 ± 0.00 | 0.07 ± 0.01 | 4.0 ± 0.3  | 7.0 ± 0.3  | 0.31 ± 0.04 |
| <i>12.12.2016</i>  | 5            | 14.6 ± 0.2     | 0.05 ± 0.00 | 0.07 ± 0.01 | 2.8 ± 0.2  | 7.0 ± 0.3  | 0.25 ± 0.03 |
| <i>27.1.2017</i>   | 5            | 47.1 ± 2.0     | 0.06 ± 0.01 | 0.07 ± 0.01 | 6.8 ± 0.1  | 9.2 ± 0.6  | 0.43 ± 0.04 |
| <i>28.3.2017</i>   | 5            | 65.3 ± 3.7     | 0.08 ± 0.01 | 0.24 ± 0.01 | 8.1 ± 0.1  | 19.1 ± 0.9 | 0.48 ± 0.03 |
| <i>3.5.2017</i>    | 5            | 28.8 ± 3.7     | 0.10 ± 0.01 | 0.22 ± 0.03 | 7.6 ± 0.6  | 9.4 ± 0.6  | 0.66 ± 0.06 |
| <i>12.6.2017</i>   | 5            | 147.6 ± 11.9   | 0.06 ± 0.01 | 0.11 ± 0.01 | 2.5 ± 0.2  | 5.8 ± 0.6  | 0.43 ± 0.03 |
| <i>12.7.2017</i>   | 5            | 190.1 ± 10.2   | 0.06 ± 0.00 | 0.08 ± 0.01 | 3.8 ± 0.3  | 4.6 ± 0.9  | 0.27 ± 0.02 |
| <i>30.8.2017</i>   | 5            | 40.9 ± 2.4     | 0.07 ± 0.01 | 1.24 ± 0.05 | 4.2 ± 0.6  | 5.6 ± 0.5  | 0.30 ± 0.01 |
| <i>4.10.2017</i>   | 5            | 6.2 ± 0.7      | 0.03 ± 0.02 | 0.13 ± 0.07 | 5.5 ± 0.6  | 5.8 ± 0.1  | 0.21 ± 0.01 |
| <i>16.11.2016</i>  | 10           | 36.3 ± 1.0     | 0.07 ± 0.01 | 0.06 ± 0.01 | 17.0 ± 0.9 | 8.4 ± 0.8  | 0.45 ± 0.04 |
| <i>12.12.2016</i>  | 10           | 30.1 ± 1.7     | 0.05 ± 0.00 | 0.09 ± 0.00 | 3.8 ± 0.1  | 5.2 ± 0.4  | 0.21 ± 0.02 |
| <i>27.1.2017</i>   | 10           | 20.6 ± 0.6     | 0.06 ± 0.01 | 0.08 ± 0.01 | 6.4 ± 0.5  | 15.7 ± 0.9 | 0.43 ± 0.02 |
| <i>28.3.2017</i>   | 10           | 56.9 ± 4.2     | 0.06 ± 0.01 | 0.09 ± 0.00 | 3.7 ± 0.2  | 5.7 ± 0.5  | 0.29 ± 0.03 |
| <i>3.5.2017</i>    | 10           | 100.0 ± 4.7    | 0.08 ± 0.01 | 0.10 ± 0.01 | 4.6 ± 0.2  | 7.8 ± 0.4  | 0.35 ± 0.05 |
| <i>12.6.2017</i>   | 10           | 217.6 ± 19.4   | 0.08 ± 0.01 | 0.15 ± 0.01 | 4.6 ± 0.3  | 4.3 ± 0.6  | 0.22 ± 0.04 |
| <i>12.7.2017</i>   | 10           | 20.4 ± 0.9     | 0.05 ± 0.01 | 0.05 ± 0.01 | 5.0 ± 0.2  | 5.1 ± 0.7  | 0.47 ± 0.04 |
| <i>30.8.2017</i>   | 10           | 6.1 ± 0.5      | 0.04 ± 0.01 | 0.07 ± 0.01 | 4.2 ± 0.1  | 4.5 ± 0.5  | 0.29 ± 0.03 |
| <i>4.10.2017</i>   | 10           | 44.6 ± 3.9     | 0.05 ± 0.01 | 0.14 ± 0.01 | 3.9 ± 0.5  | 5.4 ± 0.7  | 0.14 ± 0.02 |
|                    |              | Total (nM)     |             |             |            |            |             |
| <i>16.11.2016</i>  | 0            | 24.1 ± 2.3     | 0.06 ± 0.01 | 0.21 ± 0.04 | 8.3 ± 0.9  | 7.7 ± 0.7  | 0.56 ± 0.06 |
| <i>12.12.2016</i>  | 0            | 44.9 ± 3.2     | 0.06 ± 0.00 | 0.42 ± 0.03 | 17.2 ± 0.2 | 14.1 ± 0.9 | 0.69 ± 0.05 |
| <i>27.1.2017</i>   | 0            | 51.3 ± 2.5     | 0.08 ± 0.01 | 0.26 ± 0.03 | 9.7 ± 0.2  | 13.0 ± 0.8 | 0.72 ± 0.06 |
| <i>28.3.2017</i>   | 0            | 142.8 ± 4.2    | 0.12 ± 0.02 | 0.31 ± 0.01 | 16.0 ± 2.1 | 10.0 ± 0.5 | 0.41 ± 0.03 |
| <i>3.5.2017</i>    | 0            | 105.9 ± 29.1   | 0.10 ± 0.01 | 0.41 ± 0.03 | 10.3 ± 1.1 | 9.8 ± 0.7  | 0.53 ± 0.06 |
| <i>12.6.2017</i>   | 0            | 55.3 ± 1.1     | 0.16 ± 0.01 | 0.60 ± 0.07 | 23.4 ± 4.1 | 9.0 ± 1.0  | 0.45 ± 0.03 |
| <i>12.7.2017</i>   | 0            | 1100 ± 128     | 0.10 ± 0.01 | 0.33 ± 0.03 | 10.8 ± 0.1 | 6.4 ± 0.7  | 0.26 ± 0.02 |
| <i>30.8.2017</i>   | 0            | 203.3 ± 19.4   | 0.14 ± 0.01 | 0.66 ± 0.08 | 21.5 ± 2.3 | 11.5 ± 0.9 | 0.34 ± 0.04 |

|                   |    |                  |                 |                 |                |                |                 |
|-------------------|----|------------------|-----------------|-----------------|----------------|----------------|-----------------|
| <i>4.10.2017</i>  | 0  | $408.7 \pm 56.6$ | $0.06 \pm 0.00$ | $0.23 \pm 0.02$ | $7.7 \pm 1.2$  | $8.1 \pm 0.1$  | $0.19 \pm 0.03$ |
| <i>16.11.2016</i> | 5  | $13.1 \pm 0.5$   | $0.05 \pm 0.01$ | $0.14 \pm 0.02$ | $6.5 \pm 0.6$  | $7.7 \pm 0.5$  | $0.49 \pm 0.03$ |
| <i>12.12.2016</i> | 5  | $14.8 \pm 0.9$   | $0.05 \pm 0.00$ | $0.28 \pm 0.02$ | $6.8 \pm 0.8$  | $9.2 \pm 0.4$  | $0.59 \pm 0.07$ |
| <i>27.1.2017</i>  | 5  | $51.8 \pm 0.9$   | $0.08 \pm 0.01$ | $0.27 \pm 0.03$ | $9.5 \pm 1.0$  | $9.7 \pm 0.7$  | $0.70 \pm 0.05$ |
| <i>28.3.2017</i>  | 5  | $75.3 \pm 5.3$   | $0.12 \pm 0.01$ | $0.84 \pm 0.04$ | $13.2 \pm 1.0$ | $23.5 \pm 0.6$ | $0.73 \pm 0.07$ |
| <i>3.5.2017</i>   | 5  | $30.9 \pm 1.6$   | $0.11 \pm 0.01$ | $0.24 \pm 0.01$ | $8.2 \pm 0.0$  | $10.1 \pm 0.9$ | $0.68 \pm 0.06$ |
| <i>12.6.2017</i>  | 5  | $144.0 \pm 7.6$  | $0.06 \pm 0.01$ | $0.14 \pm 0.02$ | $5.5 \pm 0.9$  | $6.3 \pm 0.9$  | $0.37 \pm 0.02$ |
| <i>12.7.2017</i>  | 5  | $192.7 \pm 2.7$  | $0.07 \pm 0.01$ | $0.08 \pm 0.01$ | $4.6 \pm 0.5$  | $5.5 \pm 0.7$  | $0.39 \pm 0.05$ |
| <i>30.8.2017</i>  | 5  | $43.8 \pm 2.9$   | $0.11 \pm 0.01$ | $1.56 \pm 0.12$ | $5.8 \pm 0.4$  | $6.0 \pm 0.5$  | $0.35 \pm 0.02$ |
| <i>4.10.2017</i>  | 5  | $7.4 \pm 1.0$    | $0.03 \pm 0.01$ | $0.14 \pm 0.03$ | $5.6 \pm 0.6$  | $6.1 \pm 0.8$  | $0.22 \pm 0.01$ |
| <i>16.11.2016</i> | 10 | $47.0 \pm 4.4$   | $0.08 \pm 0.01$ | $0.33 \pm 0.04$ | $29.0 \pm 2.5$ | $8.6 \pm 0.4$  | $0.64 \pm 0.04$ |
| <i>12.12.2016</i> | 10 | $32.6 \pm 2.9$   | $0.05 \pm 0.01$ | $0.26 \pm 0.03$ | $5.8 \pm 0.1$  | $7.0 \pm 0.5$  | $0.50 \pm 0.02$ |
| <i>27.1.2017</i>  | 10 | $23.2 \pm 1.6$   | $0.06 \pm 0.00$ | $0.25 \pm 0.03$ | $8.8 \pm 0.6$  | $16.1 \pm 1.0$ | $0.53 \pm 0.03$ |
| <i>28.3.2017</i>  | 10 | $63.8 \pm 1.8$   | $0.08 \pm 0.02$ | $0.13 \pm 0.02$ | $4.8 \pm 0.2$  | $6.1 \pm 0.1$  | $0.32 \pm 0.03$ |
| <i>3.5.2017</i>   | 10 | $105.7 \pm 6.0$  | $0.08 \pm 0.01$ | $0.24 \pm 0.03$ | $6.0 \pm 0.2$  | $8.2 \pm 0.4$  | $0.41 \pm 0.04$ |
| <i>12.6.2017</i>  | 10 | $241.5 \pm 8.2$  | $0.07 \pm 0.01$ | $0.38 \pm 0.02$ | $5.7 \pm 0.7$  | $4.9 \pm 0.8$  | $0.25 \pm 0.02$ |
| <i>12.7.2017</i>  | 10 | $21.5 \pm 1.7$   | $0.06 \pm 0.01$ | $0.09 \pm 0.00$ | $6.2 \pm 0.2$  | $5.5 \pm 0.6$  | $1.15 \pm 0.10$ |
| <i>30.8.2017</i>  | 10 | $6.8 \pm 0.5$    | $0.07 \pm 0.01$ | $0.09 \pm 0.01$ | $5.4 \pm 0.6$  | $5.0 \pm 0.1$  | $0.38 \pm 0.01$ |
| <i>4.10.2017</i>  | 10 | $47.4 \pm 3.2$   | $0.05 \pm 0.00$ | $0.44 \pm 0.08$ | $4.0 \pm 0.5$  | $6.6 \pm 0.4$  | $0.20 \pm 0.03$ |
